# Supplementary material for: Prevalence of Medical Cannabis Use and Associated Health Conditions Documented in Electronic Health Records Among Primary Care Patients in Washington State
Source: PubMed Central journal article supplement (PMC8103224; doi:10.1001/jamanetworkopen.2021.9375), 2021-05-06
Supplement: jamanetwopen-e219375-s001.pdf [file jamanetwopen-e219375-s001.pdf]

## Supplementary Online Content

Matson TE, Carrell DS, Bobb JF, et al. Prevalence of medical cannabis use and associated health conditions documented in electronic health records among primary care patients in Washington State. *JAMA Netw Open*. 2021;4(5):e219375. doi:10.1001/jamanetworkopen.2021.9375

**eTable 1.** Unadjusted Prevalence of Health Conditions, Categorized Based on NASEM Review Among 185,565 Primary Care Patients in the Past Year

**eTable 2.** Unadjusted Prevalence of Selected Prescription Medications Among 185,565 Primary Care Patients in the Past Year

**eTable 3.** Sensitivity Analyses of Additionally Adjusted Prevalence of Health Conditions, Categorized Based on NASEM Review Among 185,565 Primary Care Patients in the Past Year

**eTable 4.** Sensitivity Analysis of Additionally Adjusted Prevalence of Selected Prescription Medications Among 185,565 Primary Care Patients in the Past Year

**This supplementary material has been provided by the authors to give readers additional information about their work.**

**eTable 1. Unadjusted Prevalence of Health Conditions, Categorized Based on NASEM Review Among 185,565 Primary Care Patients in the Past Year**

| Health condition                                                                                            | EHR-documented medical cannabis use <sup>a</sup><br>(n = 3,551) | EHR-documented other cannabis use <sup>a</sup><br>(n = 36,599) | No EHR-documented cannabis use <sup>a</sup><br>(n = 145,415) |
|-------------------------------------------------------------------------------------------------------------|-----------------------------------------------------------------|----------------------------------------------------------------|--------------------------------------------------------------|
|                                                                                                             | N (%)                                                           | N (%)                                                          | N (%)                                                        |
| <b>Conditions for which cannabis use has potential benefit based on NASEM review</b>                        |                                                                 |                                                                |                                                              |
| Any condition                                                                                               | 2,299 (64.7)                                                    | 11,670 (31.9)                                                  | 60,509 (41.6)                                                |
| Pain, chronic non-cancer <sup>b*</sup>                                                                      | 1,854 (52.2)                                                    | 7,690 (21.0)                                                   | 43,207 (29.7)                                                |
| Multiple sclerosis*                                                                                         | 44 (1.2)                                                        | 113 (0.3)                                                      | 515 (0.4)                                                    |
| Muscle spasms or spasticity*                                                                                | 268 (7.5)                                                       | 1,062 (2.9)                                                    | 5,261 (3.6)                                                  |
| Severe nausea*                                                                                              | 495 (13.9)                                                      | 1,583 (4.3)                                                    | 6,341 (4.4)                                                  |
| Sleep disorder                                                                                              | 1,089 (30.7)                                                    | 5,020 (13.7)                                                   | 28,192 (19.4)                                                |
| <b>Conditions for which cannabis use has potential risks based on NASEM review</b>                          |                                                                 |                                                                |                                                              |
| Any condition                                                                                               | 2,544 (71.6)                                                    | 17,627 (48.2)                                                  | 62,456 (43.0)                                                |
| Mental health disorders, select                                                                             | 1,240 (34.9)                                                    | 9,212 (25.2)                                                   | 41,436 (28.5)                                                |
| Depressive disorder                                                                                         | 730 (20.6)                                                      | 6,092 (16.6)                                                   | 27,079 (18.6)                                                |
| Serious mental illness <sup>c</sup>                                                                         | 797 (22.4)                                                      | 4,584 (12.5)                                                   | 22,060 (15.2)                                                |
| Respiratory conditions                                                                                      | 1,737 (48.9)                                                    | 9,196 (25.1)                                                   | 27,054 (18.6)                                                |
| Bronchitis                                                                                                  | 1,625 (45.8)                                                    | 8,670 (23.7)                                                   | 25,843 (17.8)                                                |
| COPD                                                                                                        | 188 (5.3)                                                       | 770 (2.1)                                                      | 1,752 (1.2)                                                  |
| Substance use disorder                                                                                      | 1,027 (28.9)                                                    | 5,001 (13.7)                                                   | 10,372 (7.1)                                                 |
| Cannabis use disorder                                                                                       | 332 (9.3)                                                       | 565 (1.5)                                                      | 112 (0.1)                                                    |
| Tobacco use disorder                                                                                        | 524 (14.8)                                                      | 3,423 (9.4)                                                    | 7,256 (5.0)                                                  |
| Alcohol use disorder                                                                                        | 250 (7.0)                                                       | 1,374 (3.8)                                                    | 2,802 (1.9)                                                  |
| Stimulant use disorder                                                                                      | 46 (1.3)                                                        | 174 (0.5)                                                      | 189 (0.1)                                                    |
| Opioid use disorder                                                                                         | 173 (4.9)                                                       | 369 (1.0)                                                      | 1,041 (0.7)                                                  |
| Other drug use disorder                                                                                     | 73 (2.1)                                                        | 218 (0.6)                                                      | 311 (0.2)                                                    |
| Opioid overdose                                                                                             | 24 (0.7)                                                        | 35 (0.1)                                                       | 163 (0.1)                                                    |
| <b>Conditions for which cannabis use has inconclusive evidence of benefit or risk based on NASEM review</b> |                                                                 |                                                                |                                                              |
| Anorexia or cachexia <sup>d*</sup>                                                                          | 171 (4.8)                                                       | 526 (1.4)                                                      | 2,376 (1.6)                                                  |
| Cancer*                                                                                                     | 379 (10.7)                                                      | 1,594 (4.4)                                                    | 11,865 (8.2)                                                 |
| Diabetes, type II                                                                                           | 457 (12.9)                                                      | 2,198 (6.0)                                                    | 18,650 (12.8)                                                |
| Eating disorder*                                                                                            | 30 (0.8)                                                        | 154 (0.4)                                                      | 275 (0.2)                                                    |
| Epilepsy or seizures*                                                                                       | 87 (2.5)                                                        | 356 (1.0)                                                      | 1,460 (1.0)                                                  |
| Glaucoma*                                                                                                   | 153 (4.3)                                                       | 707 (1.9)                                                      | 7,962 (5.5)                                                  |
| Heart disease                                                                                               | 604 (17.0)                                                      | 2,550 (7.0)                                                    | 21,198 (14.6)                                                |
| Hepatitis C*                                                                                                | 57 (1.6)                                                        | 176 (0.5)                                                      | 497 (0.3)                                                    |
| HIV or AIDS*                                                                                                | 20 (0.6)                                                        | 202 (0.6)                                                      | 328 (0.2)                                                    |
| Hypertension                                                                                                | 1,156 (32.6)                                                    | 6,485 (17.7)                                                   | 46,939 (32.3)                                                |
| Mental Health Disorders, select                                                                             | 1,512 (42.6)                                                    | 8,066 (22.0)                                                   | 20,181 (13.9)                                                |
| ADHD                                                                                                        | 142 (4.0)                                                       | 1,077 (2.9)                                                    | 1,744 (1.2)                                                  |
| Anxiety                                                                                                     | 1,417 (39.9)                                                    | 7,225 (19.7)                                                   | 18,618 (12.8)                                                |
| Posttraumatic stress disorder*                                                                              | 230 (6.5)                                                       | 567 (1.5)                                                      | 1,228 (0.8)                                                  |

| eTable 1, continued                                                                                                                                                                                                                                                                                                                                                       | EHR-Documented Medical Cannabis Use <sup>a</sup><br>(n = 3,551) | EHR-Documented Other Cannabis Use <sup>a</sup><br>(n = 36,599) | No EHR-Documented Cannabis Use <sup>a</sup><br>(n = 145,415) |
|---------------------------------------------------------------------------------------------------------------------------------------------------------------------------------------------------------------------------------------------------------------------------------------------------------------------------------------------------------------------------|-----------------------------------------------------------------|----------------------------------------------------------------|--------------------------------------------------------------|
|                                                                                                                                                                                                                                                                                                                                                                           | N (%)                                                           | N (%)                                                          | N (%)                                                        |
| Renal failure, chronic*                                                                                                                                                                                                                                                                                                                                                   | 8 (0.2)                                                         | 35 (0.1)                                                       | 342 (0.2)                                                    |
| Traumatic brain injury*                                                                                                                                                                                                                                                                                                                                                   | 48 (1.4)                                                        | 227 (0.6)                                                      | 879 (0.6)                                                    |
| <b>Abbreviations:</b> ADHD, attention-deficit/hyperactivity disorder; COPD, chronic obstructive pulmonary disease; EHR, electronic health record; NASEM, National Academies of Sciences, Engineering, and Medicine                                                                                                                                                        |                                                                 |                                                                |                                                              |
| * Condition authorized for medical cannabis use in Washington state                                                                                                                                                                                                                                                                                                       |                                                                 |                                                                |                                                              |
| <sup>a</sup> Mutually exclusive categories based on practitioner-documented medical cannabis use in the past year (from natural language processing-assisted EHR review and <i>International Statistical Classification of Diseases and Related Health Problems, Tenth Revision</i> diagnoses) and patient report of cannabis use in the past year on a screen (see text) |                                                                 |                                                                |                                                              |
| <sup>b</sup> Chronic non-cancer pain defined by ≥2 ICD codes for similar pain types ≥30 days apart or by ICD codes for general pain                                                                                                                                                                                                                                       |                                                                 |                                                                |                                                              |
| <sup>c</sup> Serious mental illness includes bipolar disorder, schizophrenia, and other psychosis                                                                                                                                                                                                                                                                         |                                                                 |                                                                |                                                              |
| <sup>d</sup> Includes wasting syndrome authorized for medical cannabis use in Washington state                                                                                                                                                                                                                                                                            |                                                                 |                                                                |                                                              |
| Categories of health conditions are based on the NASEM 2017 review of the health effects of cannabis and cannabinoids. <sup>6</sup> Conditions for which cannabis use has potential benefits or risks may be for certain subgroups of patients (e.g. cannabis may benefit patients with chemotherapy-induced severe nausea).                                              |                                                                 |                                                                |                                                              |

| <b>eTable 2. Unadjusted Prevalence of Selected Prescription Medications Among 185,565 Primary Care Patients in the Past Year</b>                                                                                                                                                                                                                                          |                                                                       |                                                                      |                                                                    |
|---------------------------------------------------------------------------------------------------------------------------------------------------------------------------------------------------------------------------------------------------------------------------------------------------------------------------------------------------------------------------|-----------------------------------------------------------------------|----------------------------------------------------------------------|--------------------------------------------------------------------|
| Medication use                                                                                                                                                                                                                                                                                                                                                            | <b>EHR-documented medical cannabis use<sup>a</sup></b><br>(n = 3,551) | <b>EHR-documented other cannabis use<sup>a</sup></b><br>(n = 36,599) | <b>No EHR-documented cannabis use<sup>a</sup></b><br>(n = 145,415) |
|                                                                                                                                                                                                                                                                                                                                                                           | <i>N (%)</i>                                                          | <i>N (%)</i>                                                         | <i>N (%)</i>                                                       |
| Any of the Selected Medications <sup>b</sup>                                                                                                                                                                                                                                                                                                                              | 2463 (69.4)                                                           | 14410 (39.4)                                                         | 55356 (38.1)                                                       |
| <b>Medications that treat conditions for which cannabis may have benefit</b>                                                                                                                                                                                                                                                                                              |                                                                       |                                                                      |                                                                    |
| Any                                                                                                                                                                                                                                                                                                                                                                       | 1316 (37.1)                                                           | 5107 (14)                                                            | 21045 (14.5)                                                       |
| Antiemetics                                                                                                                                                                                                                                                                                                                                                               | 593 (16.7)                                                            | 2103 (5.7)                                                           | 8772 (6.0)                                                         |
| Muscle relaxants                                                                                                                                                                                                                                                                                                                                                          | 595 (16.8)                                                            | 2560 (7.0)                                                           | 9378 (6.4)                                                         |
| Nerve pain medication                                                                                                                                                                                                                                                                                                                                                     | 592 (16.7)                                                            | 1449 (4.0)                                                           | 6851 (4.7)                                                         |
| <b>Medications that treat mental health or substance use disorders</b>                                                                                                                                                                                                                                                                                                    |                                                                       |                                                                      |                                                                    |
| Any                                                                                                                                                                                                                                                                                                                                                                       | 1449 (40.8)                                                           | 7083 (19.4)                                                          | 24543 (16.9)                                                       |
| Antidepressants                                                                                                                                                                                                                                                                                                                                                           | 1380 (38.9)                                                           | 6817 (18.6)                                                          | 23732 (16.3)                                                       |
| Buprenorphine                                                                                                                                                                                                                                                                                                                                                             | 50 (1.4)                                                              | 205 (0.6)                                                            | 893 (0.6)                                                          |
| Naloxone                                                                                                                                                                                                                                                                                                                                                                  | 42 (1.2)                                                              | 115 (0.3)                                                            | 219 (0.2)                                                          |
| Naltrexone                                                                                                                                                                                                                                                                                                                                                                | 71 (2.0)                                                              | 80 (0.2)                                                             | 321 (0.2)                                                          |
| Other AUD medications <sup>c</sup>                                                                                                                                                                                                                                                                                                                                        | 33 (0.9)                                                              | 157 (0.4)                                                            | 288 (0.2)                                                          |
| <b>Medications that are potentially addictive</b>                                                                                                                                                                                                                                                                                                                         |                                                                       |                                                                      |                                                                    |
| Any                                                                                                                                                                                                                                                                                                                                                                       | 1804 (50.8)                                                           | 9003 (24.6)                                                          | 36249 (24.9)                                                       |
| Benzodiazepines                                                                                                                                                                                                                                                                                                                                                           | 672 (18.9)                                                            | 2671 (7.3)                                                           | 9670 (6.6)                                                         |
| Opioids or Codeine                                                                                                                                                                                                                                                                                                                                                        | 1460 (41.1)                                                           | 6355 (17.4)                                                          | 28519 (19.6)                                                       |
| Other sedative hypnotics                                                                                                                                                                                                                                                                                                                                                  | 24 (0.7)                                                              | 105 (0.3)                                                            | 380 (0.3)                                                          |
| Stimulants                                                                                                                                                                                                                                                                                                                                                                | 136 (3.8)                                                             | 1193 (3.3)                                                           | 2299 (1.6)                                                         |
| Z-drugs <sup>d</sup> (for sleep)                                                                                                                                                                                                                                                                                                                                          | 86 (2.4)                                                              | 541 (1.5)                                                            | 2010 (1.4)                                                         |
| <b>Abbreviations:</b> AUD, alcohol use disorder; EHR, electronic health record                                                                                                                                                                                                                                                                                            |                                                                       |                                                                      |                                                                    |
| <sup>a</sup> Mutually exclusive categories based on practitioner-documented medical cannabis use in the past year (from natural language processing-assisted EHR review and <i>International Statistical Classification of Diseases and Related Health Problems, Tenth Revision</i> diagnoses) and patient report of cannabis use in the past year on a screen (see text) |                                                                       |                                                                      |                                                                    |
| <sup>b</sup> Any prescription medication is an indicator of any filled prescription medications reported in the table                                                                                                                                                                                                                                                     |                                                                       |                                                                      |                                                                    |
| <sup>c</sup> Other AUD medications includes acamprosate and disulfiram                                                                                                                                                                                                                                                                                                    |                                                                       |                                                                      |                                                                    |
| <sup>d</sup> Z-drugs include zaleplon, zolpidem, and eszopiclone                                                                                                                                                                                                                                                                                                          |                                                                       |                                                                      |                                                                    |

**eTable 3. Sensitivity Analyses of Additionally Adjusted<sup>a</sup> Prevalence of Health Conditions, Categorized Based on NASEM Review Among 185,565 Primary Care Patients in the Past Year**

| Health condition                                                                                            | EHR-documented medical cannabis use <sup>b</sup><br>(n = 3,551) | EHR-documented other cannabis use <sup>b</sup><br>(n = 36,599) | No EHR-documented cannabis use <sup>b</sup><br>(n = 145,415) |
|-------------------------------------------------------------------------------------------------------------|-----------------------------------------------------------------|----------------------------------------------------------------|--------------------------------------------------------------|
|                                                                                                             | Percent (95% CI)                                                | Percent (95% CI)                                               | Percent (95% CI)                                             |
| <b>Conditions for which cannabis use has potential benefit based on NASEM review</b>                        |                                                                 |                                                                |                                                              |
| Any condition                                                                                               | 49.7 (48.2-51.2)                                                | 40.5 (40.0-41.0)                                               | 39.8 (39.6-40.1)                                             |
| Pain, chronic non-cancer <sup>c*</sup>                                                                      | 35.2 (33.9-36.5)                                                | 28.7 (28.2-29.1)                                               | 28.2 (28.0-28.4)                                             |
| Multiple sclerosis*                                                                                         | 0.6 (0.4-0.8)                                                   | 0.4 (0.4-0.5)                                                  | 0.3 (0.3-0.4)                                                |
| Muscle spasms or spasticity*                                                                                | 5.1 (4.5-5.7)                                                   | 3.7 (3.4-3.9)                                                  | 3.5 (3.4-3.6)                                                |
| Severe nausea*                                                                                              | 7.6 (6.9-8.2)                                                   | 5 (4.7-5.2)                                                    | 4.3 (4.2-4.4)                                                |
| Sleep disorder                                                                                              | 21.7 (20.6-22.9)                                                | 18.5 (18.1-18.9)                                               | 18.4 (18.2-18.6)                                             |
| <b>Conditions for which cannabis use has potential risks based on NASEM review</b>                          |                                                                 |                                                                |                                                              |
| Any condition                                                                                               | 60.6 (59.0-62.3)                                                | 51.0 (50.5-51.5)                                               | 42.6 (42.3-42.8)                                             |
| Mental health disorders, select                                                                             | 36.2 (34.7-37.6)                                                | 26.5 (26.1-27)                                                 | 18.6 (18.4-18.8)                                             |
| Depressive disorder                                                                                         | 33.5 (32.1-34.9)                                                | 25.2 (24.8-25.7)                                               | 17.7 (17.5-17.9)                                             |
| Serious mental illness <sup>d</sup>                                                                         | 2.8 (2.4-3.3)                                                   | 2.0 (1.8-2.1)                                                  | 1.3 (1.2-1.3)                                                |
| Respiratory conditions                                                                                      | 26.0 (24.7-27.3)                                                | 28.0 (27.5-28.5)                                               | 28 (27.8-28.2)                                               |
| Bronchitis                                                                                                  | 15.2 (14.1-16.2)                                                | 17.4 (17.0-17.8)                                               | 18.6 (18.4-18.8)                                             |
| COPD                                                                                                        | 15.5 (14.5-16.5)                                                | 15.6 (15.2-16.0)                                               | 14.6 (14.4-14.8)                                             |
| Substance use disorder                                                                                      | 21.6 (20.4-22.8)                                                | 14.5 (14.2-14.9)                                               | 7.1 (7.0-7.2)                                                |
| Cannabis use disorder                                                                                       | 5.9 (5.2-6.6)                                                   | 1.3 (1.2-1.4)                                                  | 0.1 (0.1-0.1)                                                |
| Tobacco use disorder                                                                                        | 11.3 (10.4-12.2)                                                | 10.2 (9.8-10.5)                                                | 4.9 (4.8-5.0)                                                |
| Alcohol use disorder                                                                                        | 4.6 (4.0-5.2)                                                   | 3.9 (3.7-4.1)                                                  | 1.9 (1.9-2.0)                                                |
| Stimulant use disorder                                                                                      | 0.6 (0.4-0.7)                                                   | 0.4 (0.3-0.4)                                                  | 0.1 (0.1-0.2)                                                |
| Opioid use disorder                                                                                         | 1.9 (1.6-2.2)                                                   | 1.1 (1.0-1.3)                                                  | 0.7 (0.7-0.8)                                                |
| Other drug use disorder                                                                                     | 0.9 (0.7-1.1)                                                   | 0.5 (0.5-0.6)                                                  | 0.2 (0.2-0.3)                                                |
| Opioid Overdose                                                                                             | 0.2 (0.1-0.3)                                                   | 0.2 (0.1-0.2)                                                  | 0.1 (0.1-0.1)                                                |
| <b>Conditions for which cannabis use has inconclusive evidence of benefit or risk based on NASEM review</b> |                                                                 |                                                                |                                                              |
| Anorexia or cachexia <sup>e*</sup>                                                                          | 2.8 (2.4-3.3)                                                   | 2.0 (1.9-2.2)                                                  | 1.5 (1.5-1.6)                                                |
| Cancer*                                                                                                     | 7.5 (6.7-8.2)                                                   | 7.1 (6.8-7.4)                                                  | 7.5 (7.4-7.6)                                                |
| Diabetes, type II                                                                                           | 8.9 (8.1-9.6)                                                   | 10.2 (9.9-10.6)                                                | 11.7 (11.6-11.9)                                             |
| Eating disorder*                                                                                            | 0.4 (0.3-0.5)                                                   | 0.3 (0.3-0.4)                                                  | 0.2 (0.2-0.2)                                                |
| Epilepsy or seizures*                                                                                       | 1.3 (1.0-1.6)                                                   | 1.1 (1.0-1.2)                                                  | 1.0 (0.9-1.1)                                                |
| Glaucoma*                                                                                                   | 3.4 (2.9-4.0)                                                   | 3.9 (3.6-4.1)                                                  | 4.9 (4.8-5)                                                  |
| Heart disease                                                                                               | 11.1 (10.3-11.8)                                                | 12.1 (11.8-12.5)                                               | 13.3 (13.2-13.5)                                             |
| Hepatitis C*                                                                                                | 1.0 (0.7-1.3)                                                   | 0.7 (0.6-0.8)                                                  | 0.3 (0.3-0.4)                                                |
| HIV or AIDS*                                                                                                | 0.3 (0.2-0.4)                                                   | 0.4 (0.4-0.5)                                                  | 0.2 (0.2-0.3)                                                |
| Hypertension                                                                                                | 27.7 (26.4-28.9)                                                | 28.8 (28.3-29.3)                                               | 29.6 (29.4-29.7)                                             |
| Mental health disorders, select                                                                             | 30.8 (29.5-32.2)                                                | 20.2 (19.8-20.6)                                               | 14.4 (14.2-14.6)                                             |
| ADHD                                                                                                        | 2.3 (1.9-2.7)                                                   | 2.0 (1.9-2.1)                                                  | 1.4 (1.3-1.5)                                                |
| Anxiety                                                                                                     | 28.7 (27.4-30)                                                  | 18.5 (18.2-18.9)                                               | 13.2 (13.0-13.4)                                             |
| Posttraumatic stress disorder*                                                                              | 3.1 (2.7-3.5)                                                   | 1.5 (1.4-1.6)                                                  | 0.9 (0.8-0.9)                                                |

| eTable 3, continued                                                                                                                                                                                                                                                                                                                                                        | EHR-Documented Medical Cannabis Use <sup>b</sup><br>(n = 3,551) | EHR-Documented Other Cannabis Use <sup>b</sup><br>(n = 36,599) | No EHR-Documented Cannabis Use <sup>b</sup><br>(n = 145,415) |
|----------------------------------------------------------------------------------------------------------------------------------------------------------------------------------------------------------------------------------------------------------------------------------------------------------------------------------------------------------------------------|-----------------------------------------------------------------|----------------------------------------------------------------|--------------------------------------------------------------|
|                                                                                                                                                                                                                                                                                                                                                                            | <i>Percent (95% CI)</i>                                         | <i>Percent (95% CI)</i>                                        | <i>Percent (95% CI)</i>                                      |
| Renal failure, chronic*                                                                                                                                                                                                                                                                                                                                                    | 0.1 (0.0-0.1)                                                   | 0.2 (0.1-0.3)                                                  | 0.2 (0.2-0.2)                                                |
| Traumatic brain injury*                                                                                                                                                                                                                                                                                                                                                    | 0.8 (0.5-1.0)                                                   | 0.6 (0.6-0.7)                                                  | 0.6 (0.6-0.7)                                                |
| <b>Abbreviations:</b> ADHD, attention-deficit/hyperactivity disorder; COPD, chronic obstructive pulmonary disease; EHR, electronic health record; NASEM, National Academies of Sciences, Engineering, and Medicine                                                                                                                                                         |                                                                 |                                                                |                                                              |
| * Condition authorized for medical cannabis use in Washington state                                                                                                                                                                                                                                                                                                        |                                                                 |                                                                |                                                              |
| <sup>a</sup> Estimates adjusted for age, sex, race, ethnicity, insurance, note-days, and clinic                                                                                                                                                                                                                                                                            |                                                                 |                                                                |                                                              |
| <sup>b</sup> Mutually exclusive categories based on practitioner-documented medical cannabis use in the past year (from natural language processing-assisted EHR review and <i>International Statistical Classification of Diseases and Related Health Problems, Tenth Revision</i> diagnoses), and patient report of cannabis use in the past year on a screen (see text) |                                                                 |                                                                |                                                              |
| <sup>c</sup> Chronic non-cancer pain defined by $\geq 2$ ICD codes for similar pain types $\geq 30$ days apart or by ICD codes for general pain                                                                                                                                                                                                                            |                                                                 |                                                                |                                                              |
| <sup>d</sup> Serious mental illness includes bipolar disorder, schizophrenia, and other psychosis                                                                                                                                                                                                                                                                          |                                                                 |                                                                |                                                              |
| <sup>e</sup> Includes wasting syndrome authorized for medical cannabis use in Washington state                                                                                                                                                                                                                                                                             |                                                                 |                                                                |                                                              |
| Categories of health conditions are based on the NASEM 2017 review of the health effects of cannabis and cannabinoids. <sup>6</sup> Conditions for which cannabis use has potential benefits or risks may be for certain subgroups of patients (e.g. cannabis may benefit patients with chemotherapy-induced severe nausea).                                               |                                                                 |                                                                |                                                              |

**eTable 4. Sensitivity Analysis of Additionally Adjusted<sup>a</sup> Prevalence of Selected Prescription Medications Among 185,565 Primary Care Patients in the Past Year**

|                                                                                                                                                                                                                                                                                                                                                                           | <b>EHR-documented medical use<sup>b</sup></b><br>(n = 3,551) | <b>EHR-documented other use<sup>b</sup></b><br>(n = 36,599) | <b>No EHR-documented cannabis use<sup>b</sup></b><br>(n = 145,415) |
|---------------------------------------------------------------------------------------------------------------------------------------------------------------------------------------------------------------------------------------------------------------------------------------------------------------------------------------------------------------------------|--------------------------------------------------------------|-------------------------------------------------------------|--------------------------------------------------------------------|
|                                                                                                                                                                                                                                                                                                                                                                           | <i>Percent (95% CI)</i>                                      | <i>Percent (95% CI)</i>                                     | <i>Percent (95% CI)</i>                                            |
| Any of the selected medications <sup>c</sup>                                                                                                                                                                                                                                                                                                                              | 54.5 (53.0-56.1)                                             | 45.0 (44.5-45.5)                                            | 37.1 (36.9-37.4)                                                   |
| <b>Medications that treat conditions for which cannabis may have benefit</b>                                                                                                                                                                                                                                                                                              |                                                              |                                                             |                                                                    |
| Any                                                                                                                                                                                                                                                                                                                                                                       | 23.5 (22.4-24.7)                                             | 17.1 (16.7-17.5)                                            | 14.1 (13.9-14.2)                                                   |
| Antiemetics                                                                                                                                                                                                                                                                                                                                                               | 9.0 (8.3-9.7)                                                | 6.7 (6.4-7.0)                                               | 6.0 (5.8-6.1)                                                      |
| Muscle relaxants                                                                                                                                                                                                                                                                                                                                                          | 9.9 (9.1-10.7)                                               | 8.2 (7.9-8.5)                                               | 6.3 (6.2-6.4)                                                      |
| Nerve pain medication                                                                                                                                                                                                                                                                                                                                                     | 9.0 (8.3-9.7)                                                | 6.0 (5.7-6.3)                                               | 4.4 (4.3-4.5)                                                      |
| <b>Medications that treat mental health or substance use disorders</b>                                                                                                                                                                                                                                                                                                    |                                                              |                                                             |                                                                    |
| Any                                                                                                                                                                                                                                                                                                                                                                       | 28.6 (27.3-29.9)                                             | 22.3 (21.9-22.8)                                            | 16.5 (16.3-16.7)                                                   |
| Antidepressants                                                                                                                                                                                                                                                                                                                                                           | 27.2 (25.9-28.5)                                             | 21.6 (21.2-22.1)                                            | 15.9 (15.8-16.1)                                                   |
| Buprenorphine                                                                                                                                                                                                                                                                                                                                                             | 0.6 (0.5-0.8)                                                | 0.6 (0.5-0.7)                                               | 0.6 (0.6-0.7)                                                      |
| Naloxone                                                                                                                                                                                                                                                                                                                                                                  | 0.5 (0.4-0.7)                                                | 0.2 (0.2-0.3)                                               | 0.2 (0.1-0.2)                                                      |
| Naltrexone                                                                                                                                                                                                                                                                                                                                                                | 0.6 (0.5-0.8)                                                | 0.3 (0.3-0.4)                                               | 0.2 (0.2-0.2)                                                      |
| Other AUD medications <sup>d</sup>                                                                                                                                                                                                                                                                                                                                        | 0.5 (0.3-0.7)                                                | 0.4 (0.3-0.5)                                               | 0.2 (0.2-0.2)                                                      |
| <b>Medications that are potentially addictive</b>                                                                                                                                                                                                                                                                                                                         |                                                              |                                                             |                                                                    |
| Any                                                                                                                                                                                                                                                                                                                                                                       | 34.8 (33.5-36.2)                                             | 29.7 (29.2-30.1)                                            | 24.2 (24.0-24.4)                                                   |
| Benzodiazepines                                                                                                                                                                                                                                                                                                                                                           | 11.3 (10.5-12.2)                                             | 9.0 (8.7-9.4)                                               | 6.4 (6.3-6.6)                                                      |
| Opioids or codeine                                                                                                                                                                                                                                                                                                                                                        | 26.2 (25.0-27.4)                                             | 22.6 (22.1-23)                                              | 18.8 (18.6-19)                                                     |
| Other sedative hypnotics                                                                                                                                                                                                                                                                                                                                                  | 0.3 (0.2-0.5)                                                | 0.4 (0.3-0.5)                                               | 0.3 (0.2-0.3)                                                      |
| Stimulants                                                                                                                                                                                                                                                                                                                                                                | 2.2 (1.8-2.5)                                                | 2.4 (2.3-2.5)                                               | 1.8 (1.7-1.8)                                                      |
| Z-drugs <sup>e</sup> (for sleep)                                                                                                                                                                                                                                                                                                                                          | 1.6 (1.2-1.9)                                                | 1.8 (1.6-1.9)                                               | 1.3 (1.3-1.4)                                                      |
| <b>Abbreviations:</b> AUD, alcohol use disorder; EHR, electronic health record                                                                                                                                                                                                                                                                                            |                                                              |                                                             |                                                                    |
| <sup>a</sup> Estimates adjusted for age, sex, race, ethnicity, insurance, note-days, and clinic                                                                                                                                                                                                                                                                           |                                                              |                                                             |                                                                    |
| <sup>b</sup> Mutually exclusive categories based on practitioner-documented medical cannabis use in the past year (from natural language processing-assisted EHR review and <i>International Statistical Classification of Diseases and Related Health Problems, Tenth Revision</i> diagnoses) and patient report of cannabis use in the past year on a screen (see text) |                                                              |                                                             |                                                                    |
| <sup>c</sup> Any prescription medication is an indicator of any filled prescription medications reported in the table                                                                                                                                                                                                                                                     |                                                              |                                                             |                                                                    |
| <sup>d</sup> Other AUD medications includes acamprosate and disulfiram                                                                                                                                                                                                                                                                                                    |                                                              |                                                             |                                                                    |
| <sup>e</sup> Z-drugs include zaleplon, zolpidem, and eszopiclone                                                                                                                                                                                                                                                                                                          |                                                              |                                                             |                                                                    |
